# Supplementary material for: Unveiling differential gene co-expression networks and its effects on levodopa-induced dyskinesia
Source: PubMed Central journal article supplement — iScience. 2024 Aug 26;27(9):110835. doi: 10.1016/j.isci.2024.110835 (PMC11409023; doi:10.1016/j.isci.2024.110835), 2024-08-26
Supplement: mmc1.pdf [file mmc1.pdf]

**Supplemental information**

**Unveiling differential gene**

**co-expression networks and its effects**

**on levodopa-induced dyskinesia**

**Tatiane Piedade de Souza, Gilderlanio Santana de Araújo, Leandro Magalhães, Giovanna C. Cavalcante, Arthur Ribeiro-dos-Santos, Camille Sena-dos-Santos, Caio Santos Silva, Gracivane Lopes Eufraeso, Alana de Freitas Escudeiro, Giordano Bruno Soares-Souza, Bruno Lopes Santos-Lobato, and Ândrea Ribeiro-dos-Santos**

**FIGURE S1 – General RNA sequencing data, related to Figure 1.**

**A**

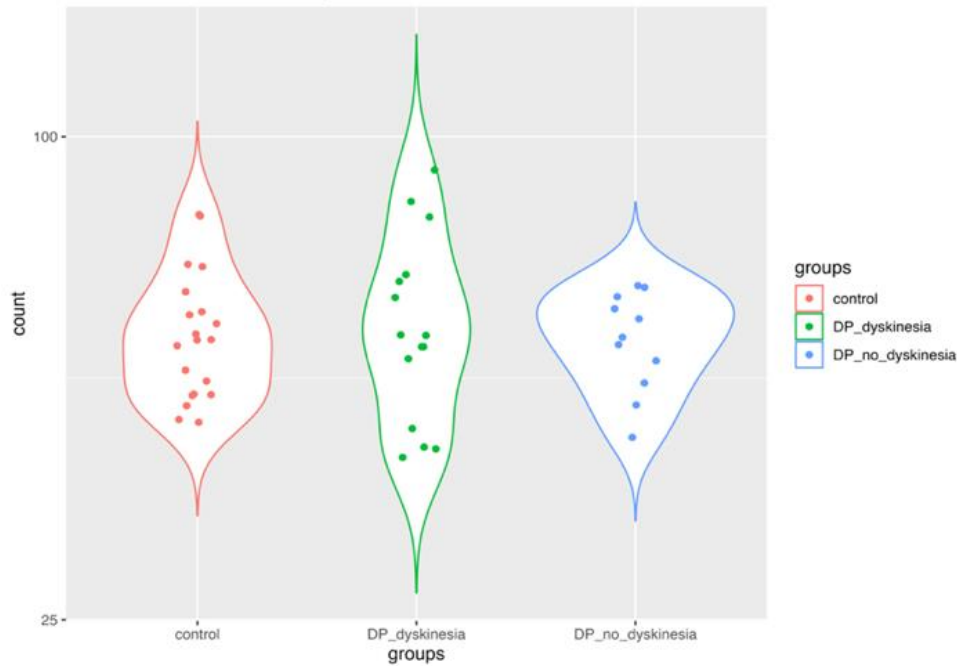

**B**

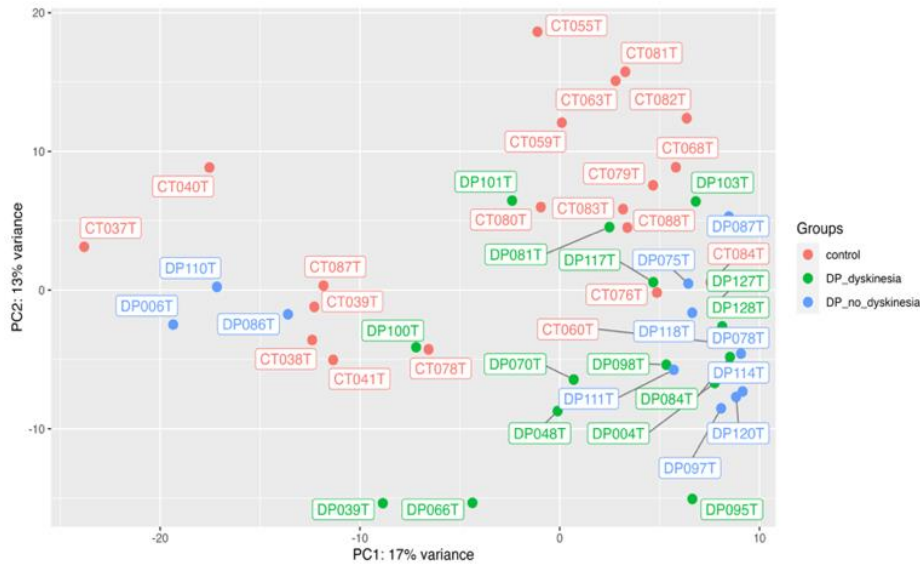

**Figure S1. A)** Distribution of counts of the samples by group, related to figure 1. Control group samples are represented in red, PD with dyskinesia group samples in green, and PD without dyskinesia group samples in blue. **B)** PCA of the sample distribution, related to figure 1. PCA plot showing sample distribution by group: control samples in red, PD with dyskinesia samples in green, and PD without dyskinesia samples in blue. Abbreviations: PD\_dyskinesia, people with Parkinson's disease with levodopa-induced dyskinesia; PD\_no\_dyskinesia, people with Parkinson's disease without levodopa-induced dyskinesia.

**FIGURE S2 - Results of differential expression analysis, related to Figure 2 and Table 2.**

**A**

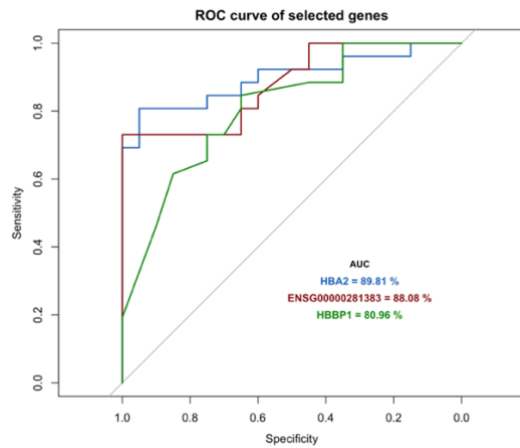

**B)**

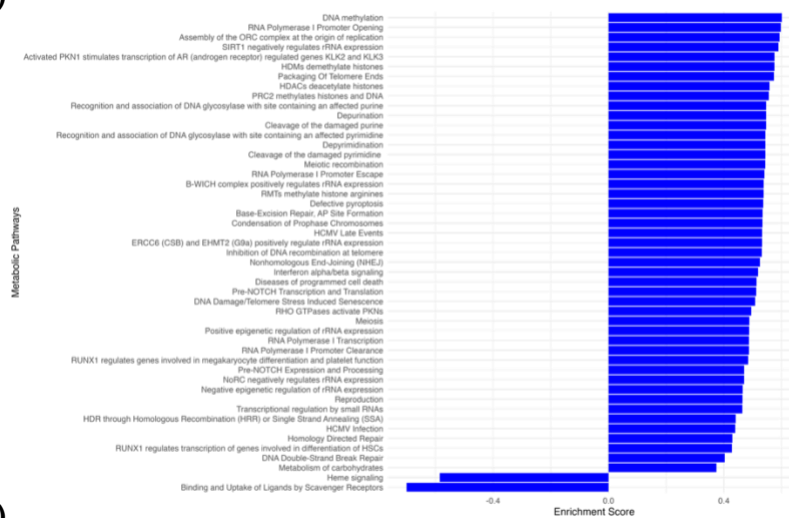

**C)**

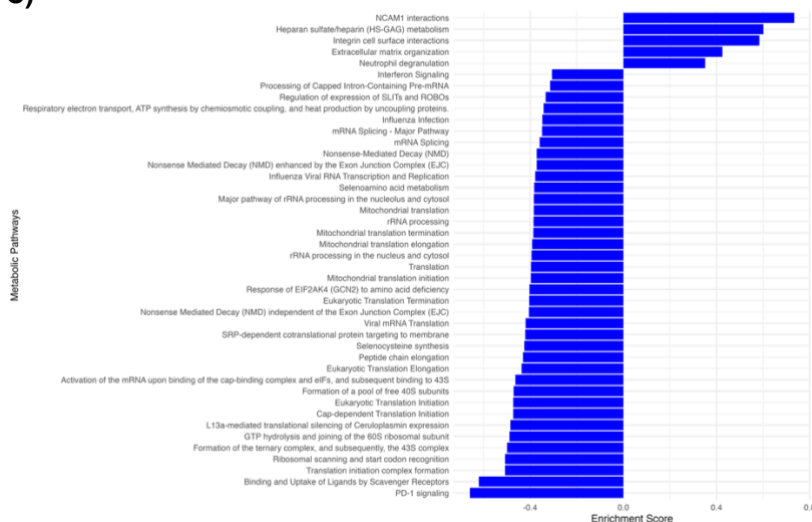

**Figure S2. A)** ROC curve of differentially expressed genes with areas under the curve (AUC) over 0.8, related to figure 2. HBA2 gene is represented in blue (AUC = 89.81), ENSG0000281383 in brown (AUC = 88.08), and HBBP1 in green (AUC = 80.96). **B)** Gene Set Enrichment Analysis of genes investigated in differential analysis expression for PD-ND group, related to figure 2A. Metabolic pathways enriched through GSEA, based on the ranking of gene expression levels (from highest to lowest) of the PD-ND group compared to the control group. The pathways are ordered from the highest enrichment scores to the lowest. **C)** Gene Set Enrichment Analysis of genes investigated in differential analysis expression for PD-D group, related to figure 2B. Metabolic pathways enriched through GSEA, based on the ranking of gene expression levels (from highest to lowest) of the PD-D group compared to the control group. The pathways are ordered from the highest enrichment scores to the lowest.

**TABLE S1. Epidemiological data of patients with PD and healthy controls, related to Table 1.**

| <b>ID</b> | <b>GROUP</b> | <b>AAO</b> | <b>AAE</b> | <b>SEX</b> |
|-----------|--------------|------------|------------|------------|
| CT001     | CT           | -          | 67         | Female     |
| CT002     | CT           | -          | 53         | Female     |
| CT003     | CT           | -          | 67         | Female     |
| CT004     | CT           | -          | 45         | Female     |
| CT005     | CT           | -          | 68         | Female     |
| CT006     | CT           | -          | 64         | Male       |
| CT007     | CT           | -          | 63         | Male       |
| CT008     | CT           | -          | 60         | Male       |
| CT009     | CT           | -          | 62         | Male       |
| CT010     | CT           | -          | 52         | Male       |
| CT011     | CT           | -          | 55         | Male       |
| CT012     | CT           | -          | 60         | Female     |
| CT013     | CT           | -          | 53         | Male       |
| CT014     | CT           | -          | 74         | Male       |
| CT015     | CT           | -          | 64         | Male       |
| CT016     | CT           | -          | 59         | Male       |
| CT017     | CT           | -          | 53         | Male       |
| CT018     | CT           | -          | 50         | Male       |
| CT019     | CT           | -          | 55         | Female     |
| CT020     | CT           | -          | 49         | Male       |
| DP001     | PD-D         | 39         | 51         | Male       |
| DP002     | PD-ND        | 44         | 49         | Female     |
| DP003     | PD-D         | 37         | 48         | Female     |
| DP004     | PD-D         | 39         | 49         | Female     |
| DP005     | PD-D         | 42         | 54         | Female     |
| DP006     | PD-D         | 38         | 52         | Male       |
| DP007     | PD-ND        | 56         | 61         | Male       |
| DP008     | PD-ND        | 47         | 51         | Male       |
| DP009     | PD-D         | 49         | 52         | Male       |
| DP010     | PD-D         | 49         | 60         | Male       |
| DP011     | PD-ND        | 54         | 60         | Female     |
| DP012     | PD-ND        | 63         | 64         | Male       |
| DP013     | PD-D         | 49         | 61         | Male       |
| DP014     | PD-ND        | 62         | 67         | Male       |
| DP015     | PD-D         | 58         | 64         | Male       |
| DP016     | PD-D         | 52         | 60         | Female     |
| DP017     | PD-D         | 41         | 53         | Male       |
| DP018     | PD-D         | 34         | 46         | Male       |
| DP019     | PD-ND        | 50         | 54         | Female     |
| DP020     | PD-ND        | 50         | 60         | Male       |
| DP021     | PD-ND        | 48         | 50         | Male       |
| DP022     | PD-D         | 36         | 46         | Male       |
| DP023     | PD-ND        | 45         | 47         | Male       |
| DP024     | PD-ND        | 40         | 46         | Male       |
| DP025     | PD-D         | 61         | 66         | Male       |
| DP026     | PD-D         | 41         | 59         | Male       |

Abbreviations: AAE, age at evaluation; AAO, age at disease onset; CT, control group; -, not applied; PD-D, Patients with PD with LID; PD-ND, Patients with PD without LID.

**TABLE S3. Over Representation Analysis - Exclusive enriched pathways in PD-D, related to Figure 3F.**

| <b>Module</b> | <b>Description</b>                                                                                     | <b>BgRatio</b> | <b>pvalue</b>        | <b>p.adjust</b>    | <b>qvalue</b>      |
|---------------|--------------------------------------------------------------------------------------------------------|----------------|----------------------|--------------------|--------------------|
| M4            | Signaling by ROBO receptors                                                                            | 71/967         | 1,92E-35             | 2,27E-33           | 1,94E-33           |
| M4            | Metabolism of amino acids and derivatives                                                              | 69/967         | 1,14E-33             | 1,25E-32           | 1,06E-32           |
| M4            | Axon guidance                                                                                          | 108/967        | 1,45E-20             | 1,53E-19           | 1,30E-19           |
| M4            | Nervous system development                                                                             | 109/967        | 2,68E-20             | 2,72E-19           | 2,32E-19           |
| M4            | Cellular responses to stimuli                                                                          | 147/967        | 8,30E-16             | 7,61E-15           | 6,48E-15           |
| M4            | Cellular responses to stress                                                                           | 147/967        | 8,30E-16             | 7,61E-15           | 6,48E-15           |
| M4            | Infectious disease                                                                                     | 164/967        | 3,29E-15             | 2,92E-14           | 2,49E-15           |
| M4            | SARS-CoV-1 modulates host translation machinery                                                        | 29/967         | 3,16E-07             | 2,64E-06           | 2,25E-06           |
| M4            | Metabolism                                                                                             | 197/967        | 4,21E-07             | 3,42E-06           | 2,91E-07           |
| M4            | SARS-CoV-2 modulates host translation machinery                                                        | 28/967         | 3,93E-06             | 3,10E-05           | 2,64E-05           |
| M4            | Formation of the ternary complex, and subsequently, the 43S complex                                    | 30/967         | 5,38E-05             | 4,13E-04           | 3,52E-04           |
| M4            | SARS-CoV-2 Infection                                                                                   | 68/967         | 5,90E+03             | 3,64E+04           | 3,10E+04           |
| M4            | Activation of the mRNA upon binding of the cap-binding complex and eIFs, and subsequent binding to 43S | 32/967         | 5,23E-04             | 3,62E-03           | 3,09E-04           |
| M4            | Developmental Biology                                                                                  | 146/967        | 2,18E-12             | 1,87E-11           | 1,60E-11           |
| M4            | SARS-CoV-1-host interactions                                                                           | 40/967         | 1,42E-03             | 9,62E-03           | 8,20E-03           |
| M4            | Ribosomal scanning and start codon recognition                                                         | 33/967         | 1,47E-03             | 9,73E-04           | 8,29E-03           |
| M4            | SARS-CoV-1 Infection                                                                                   | 46/967         | 1,23E-01             | 7,95E-01           | 6,78E-01           |
| M4            | Downstream TCR signaling                                                                               | 20/967         | 0.00456532186563808  | 0.0270114877050253 | 0.02302684274335   |
| M4            | SARS-CoV-2-host interactions                                                                           | 56/967         | 3,64E+01             | 2,30E+02           | 1,96E+02           |
| M4            | Translation initiation complex formation                                                               | 32/967         | 5,23E-04             | 3,62E-03           | 3,09E-04           |
| M4            | Disease                                                                                                | 245/967        | 1,12E-04             | 8,16E-04           | 6,96E-04           |
| M6            | L1CAM interactions                                                                                     | 13/967         | 6,59E+09             | 0.0208332995039624 | 0.0169331281777709 |
| M6            | Extracellular matrix organization                                                                      | 21/967         | 0.000181301676642804 | 0.028645664909563  | 0.023282952158339  |
| M4            | SARS-CoV Infections                                                                                    | 85/967         | 3,15E+04             | 1,90E+05           | 1,62E+05           |
